# Supplementary material for: Genetic Removal of the CH1 Exon Enables the Production of Heavy Chain-Only IgG in Mice
Source: Front Immunol. 2018 Sep 25;9:2202. doi: 10.3389/fimmu.2018.02202 (PMC6167435; doi:10.3389/fimmu.2018.02202)
Supplement: Supplementary file 1 [file Data_Sheet_1.docx]

**Genetic Removal of the CH1 Exon Enables the Production of Heavy Chain-only IgG in Mice**

*Tianyi Zhang 1†‡, Xueqian Cheng 1‡, Di Yu 1‡, Fuyu Lin 2, Ning Hou 2, Xuan Cheng 2, Shanshan Hao 1, Jingjing Wei 1, Li Ma 1, Yanbin Fu 1, Yonghe Ma 1, Liming Ren 1, Haitang Han 1, Shuyang Yu 1*, Xiao Yang 2*, and Yaofeng Zhao 1**

*** Correspondence:**

**Yaofeng Zhao**

[yaofengzhao@cau.edu.cn](mailto:yaofengzhao@cau.edu.cn)

**Xiao Yang**

[yangx@bmi.ac.cn](mailto:yangx@bmi.ac.cn)

**Shuyang Yu**

[ysy@cau.edu.cn](mailto:ysy@cau.edu.cn)

**
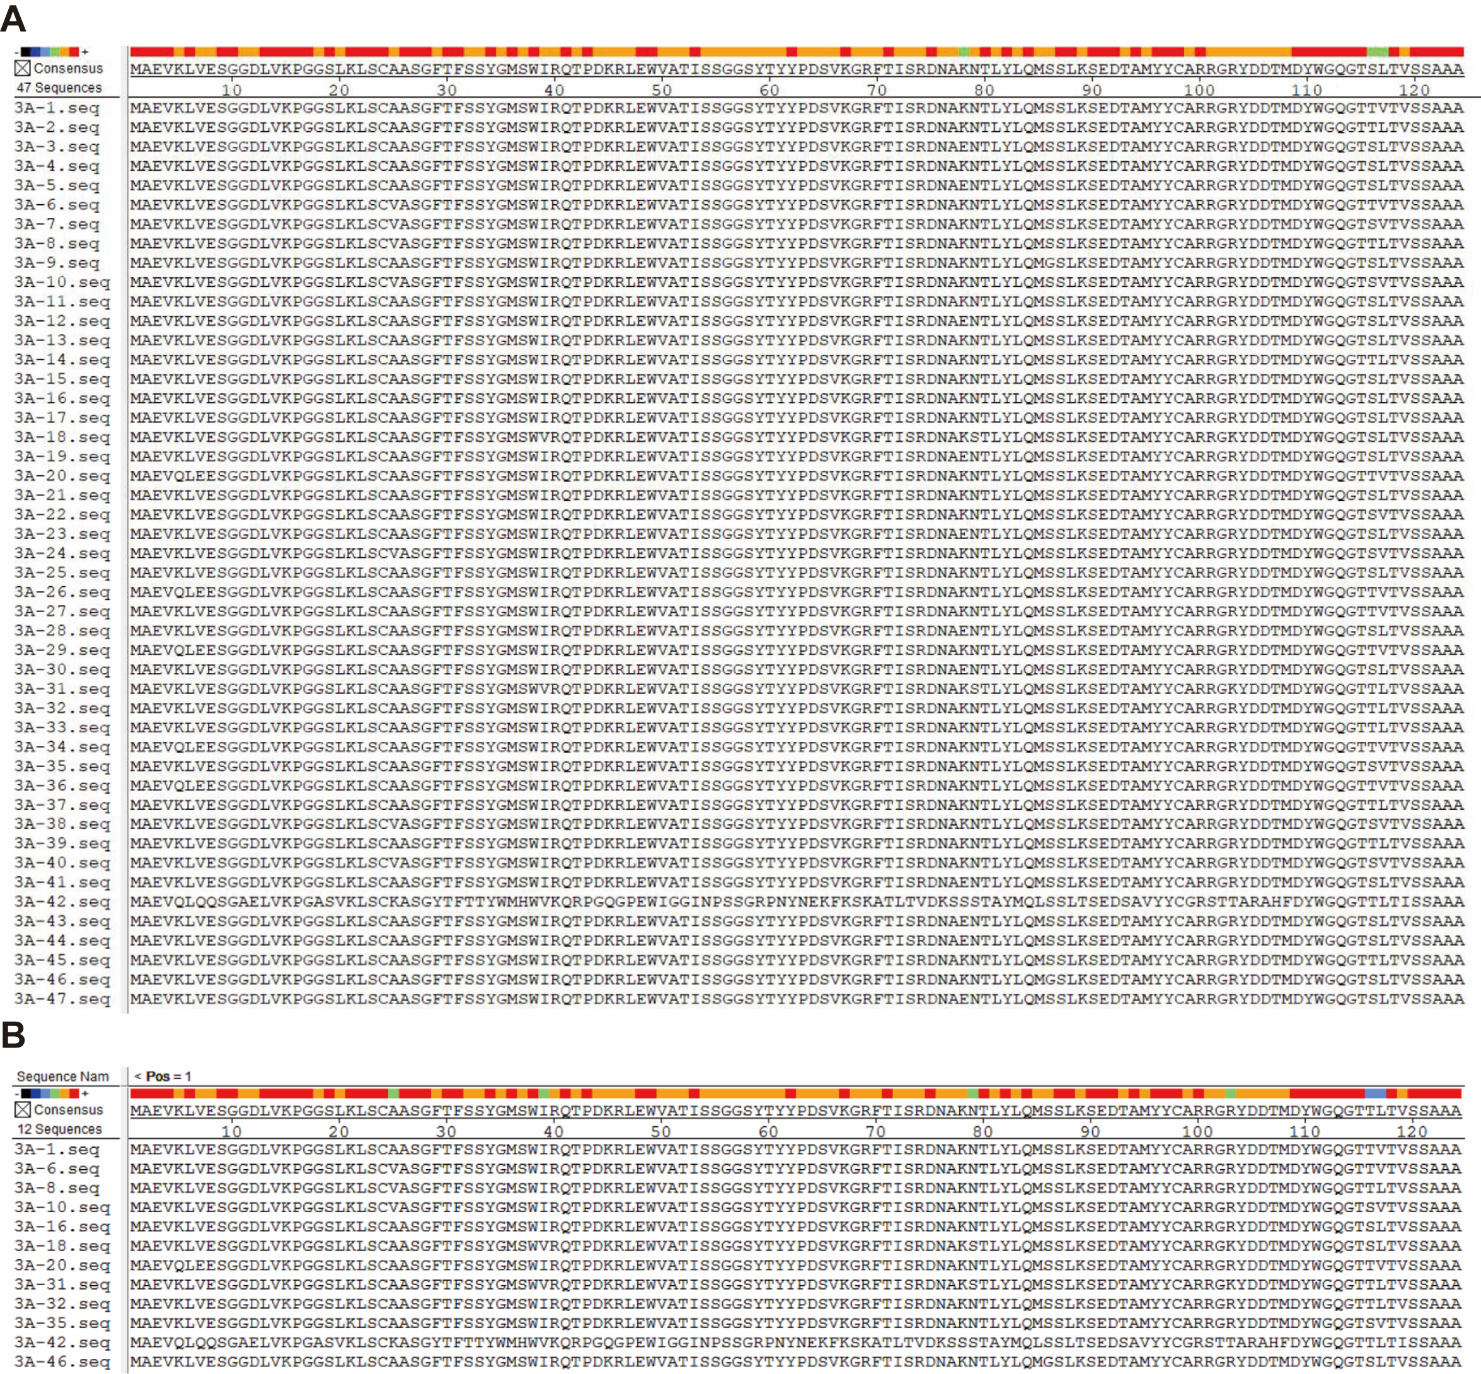
SUPPLEMENTARY FIGURE 1**

**FIGURE S1.** Amino acid sequences of selected clones after bio-panning. (**A**) Amino acid sequences of selected 47 clones after three rounds of bio-panning. (**B**) The 12 unique amino acid sequences obtained after three rounds of bio-panning are indicated.
